# Supplementary material for: The Mesh of Civilizations in the Global Network of Digital Communication
Source: PubMed Central journal article supplement (PMC4449232; doi:10.1371/journal.pone.0122543), 2015-05-29
Supplement: pone.0122543.s001.pdf [file pone.0122543.s001.pdf]

**The Mesh of Civilizations:  
Supplemental Material**

**Table S1. Countries included in analysis**

| No. | Country                          | ISO 3166-2 Code |
|-----|----------------------------------|-----------------|
| 1   | United Arab Emirates             | AE              |
| 2   | Angola                           | AO              |
| 3   | Argentina                        | AR              |
| 4   | Austria                          | AT              |
| 5   | Australia                        | AU              |
| 6   | Azerbaijan                       | AZ              |
| 7   | Bangladesh                       | BD              |
| 8   | Belgium                          | BE              |
| 9   | Burkina Faso                     | BF              |
| 10  | Bulgaria                         | BG              |
| 11  | Burundi                          | BI              |
| 12  | Bolivia, Plurinational State Of  | BO              |
| 13  | Brazil                           | BR              |
| 14  | Belarus                          | BY              |
| 15  | Canada                           | CA              |
| 16  | Congo, The Democrat. Republic Of | CD              |
| 17  | Switzerland                      | CH              |
| 18  | Cote D'Ivoire                    | CI              |
| 19  | Chile                            | CL              |
| 20  | Cameroon                         | CM              |
| 21  | China                            | CN              |
| 22  | Colombia                         | CO              |
| 23  | Czech Republic                   | CZ              |
| 24  | Germany                          | DE              |
| 25  | Denmark                          | DK              |
| 26  | Dominican Republic               | DO              |
| 27  | Algeria                          | DZ              |
| 28  | Ecuador                          | EC              |
| 29  | Egypt                            | EG              |
| 30  | Spain                            | ES              |
| 31  | Ethiopia                         | ET              |
| 32  | Finland                          | FI              |
| 33  | France                           | FR              |
| 34  | United Kingdom                   | GB              |
| 35  | Ghana                            | GH              |
| 36  | Greece                           | GR              |
| 37  | Guatemala                        | GT              |
| 38  | Honduras                         | HN              |
| 39  | Haiti                            | HT              |
| 40  | Hungary                          | HU              |

|    |                                  |    |
|----|----------------------------------|----|
| 41 | Indonesia                        | ID |
| 42 | Israel                           | IL |
| 43 | India                            | IN |
| 44 | Italy                            | IT |
| 45 | Jordan                           | JO |
| 46 | Japan                            | JP |
| 47 | Kenya                            | KE |
| 48 | Cambodia                         | KH |
| 49 | Korea, Republic Of               | KR |
| 50 | Kazakhstan                       | KZ |
| 51 | Lao People's Democratic Republic | LA |
| 52 | Sri Lanka                        | LK |
| 53 | Morocco                          | MA |
| 54 | Madagascar                       | MG |
| 55 | Mali                             | ML |
| 56 | Mexico                           | MX |
| 57 | Malaysia                         | MY |
| 58 | Mozambique                       | MZ |
| 59 | Nigeria                          | NG |
| 60 | Nicaragua                        | NI |
| 61 | Netherlands                      | NL |
| 62 | Nepal                            | NP |
| 63 | Peru                             | PE |
| 64 | Papua New Guinea                 | PG |
| 65 | Philippines                      | PH |
| 66 | Pakistan                         | PK |
| 67 | Poland                           | PL |
| 68 | Portugal                         | PT |
| 69 | Paraguay                         | PY |
| 70 | Romania                          | RO |
| 71 | Russian Federation               | RU |
| 72 | Saudi Arabia                     | SA |
| 73 | Sudan                            | SD |
| 74 | Sweden                           | SE |
| 75 | Singapore                        | SG |
| 76 | Slovakia                         | SK |
| 77 | Senegal                          | SN |
| 78 | El Salvador                      | SV |
| 79 | Thailand                         | TH |
| 80 | Tunisia                          | TN |
| 81 | Turkey                           | TR |
| 82 | Ukraine                          | UA |
| 83 | United States                    | US |
| 84 | Uzbekistan                       | UZ |

|    |                                   |    |
|----|-----------------------------------|----|
| 85 | Venezuela, Bolivarian Republic Of | VE |
| 86 | Vietnam                           | VN |
| 87 | Yemen                             | YE |
| 88 | South Africa                      | ZA |
| 89 | Zambia                            | ZM |
| 90 | Zimbabwe                          | ZW |

---
