# Supplementary material for: The Mesh of Civilizations in the Global Network of Digital Communication
Source: PubMed Central journal article supplement (PMC4449232; doi:10.1371/journal.pone.0122543), 2015-05-29
Supplement: pone.0122543.s002.pdf [file pone.0122543.s002.pdf]

**Table S2. Political alliance codings**

---

**Eastern Bloc**

|            |                |            |
|------------|----------------|------------|
| Azerbaijan | Czech Republic | Russia     |
| Belarus    | Hungary        | Slovakia   |
| Bulgaria   | Kazakhstan     | Ukraine    |
| Cambodia   | Poland         | Uzbekistan |
| China      | Romania        | Vietnam    |

**Western Bloc**

|                    |             |             |
|--------------------|-------------|-------------|
| Argentina          | Ecuador     | Pakistan    |
| Australia          | El Salvador | Paraguay    |
| Belgium            | France      | Philippines |
| Bolivia            | Guatemala   | Portugal    |
| Brazil             | Haiti       | Thailand    |
| Canada             | Honduras    | Turkey      |
| Chile              | Italy       | U.K.        |
| Colombia           | Japan       | U.S.        |
| Denmark            | Mexico      | Venezuela   |
| Dominican Republic | Nicaragua   |             |

**Non-Aligned Movement**

|               |            |              |
|---------------|------------|--------------|
| Algeria       | Ethiopia   | Nigeria      |
| Angola        | Ghana      | Pakistan     |
| Argentina     | India      | Peru         |
| Bangladesh    | Indonesia  | Saudi Arabia |
| Benin         | Jordan     | Senegal      |
| Bolivia       | Kenya      | Singapore    |
| Burkina Faso  | Laos       | Sri Lanka    |
| Cameroon      | Madagascar | Sudan        |
| Chile         | Malawi     | Tunisia      |
| Colombia      | Malaysia   | U.A.E.       |
| Congo, DRC    | Morocco    | Yemen        |
| Cote d'Ivoire | Nepal      | Zambia       |
| Ecuador       | Nicaragua  | Zimbabwe     |
| Egypt         |            |              |
