# Supplementary material for: The Mesh of Civilizations in the Global Network of Digital Communication
Source: PubMed Central journal article supplement (PMC4449232; doi:10.1371/journal.pone.0122543), 2015-05-29
Supplement: pone.0122543.s003.pdf [file pone.0122543.s003.pdf]

**Table S3. Common civilization coefficient for different levels of minimum population threshold.**

| Threshold | Model 0 | Model 1 | Model 2 | Model 3 | Model 4 |
|-----------|---------|---------|---------|---------|---------|
| 1m        | 1.83*   | 1.40*   | 1.32*   | 0.36*   | 0.32*   |
| 5m        | 1.77*   | 1.28*   | 1.23*   | 0.15    | 0.09    |
| 10m       | 1.54*   | 1.07*   | 1.06*   | 0.05    | 0.02    |
| 20m       | 1.15*   | 0.85*   | 0.87*   | 0.03    | 0.03    |

\*Significant at .01 level. See Table 1 in main text for model specification.
